# Supplementary material for: Human EAG channels are directly modulated by PIP2 as revealed by electrophysiological and optical interference investigations
Source: PubMed Central journal article supplement (PMC4804213; doi:10.1038/srep23417), 2016-03-23
Supplement: srep23417-s1.pdf [file srep23417-s1.pdf]

## Supplementary Information

Human EAG channels are directly modulated by PIP<sub>2</sub> as revealed by electrophysiological and optical interference investigations

Bo Han<sup>1</sup>, Kunyan He<sup>1</sup>, Chunlin Cai<sup>1</sup>, Yin Tang<sup>1</sup>, Linli Yang<sup>1</sup>, Stefan H. Heinemann<sup>2</sup>, Toshinori Hoshi<sup>3</sup>, Shangwei Hou<sup>1,4,5,\*</sup>

<sup>1</sup>Key Laboratory of Systems Biomedicine (Ministry of Education), Institute of Systems Biomedicine, Shanghai Jiao Tong University, Shanghai 200240, China

<sup>2</sup>Center for Molecular Biomedicine, Department of Biophysics, Friedrich Schiller University Jena & Jena University Hospital, Hans-Knöll-Str. 2, D-07745 Jena, Germany

<sup>3</sup>Department of Physiology, University of Pennsylvania, Philadelphia, PA 19104, USA

<sup>4</sup>Tongren Hospital, School of Medicine, Shanghai Jiao Tong University, Shanghai 200240, China

<sup>5</sup>State Key Laboratory of Oncogenes and Related Genes, Shanghai Cancer Institute, Renji Hospital, School of Medicine, Shanghai Jiao Tong University, Shanghai 200240, China

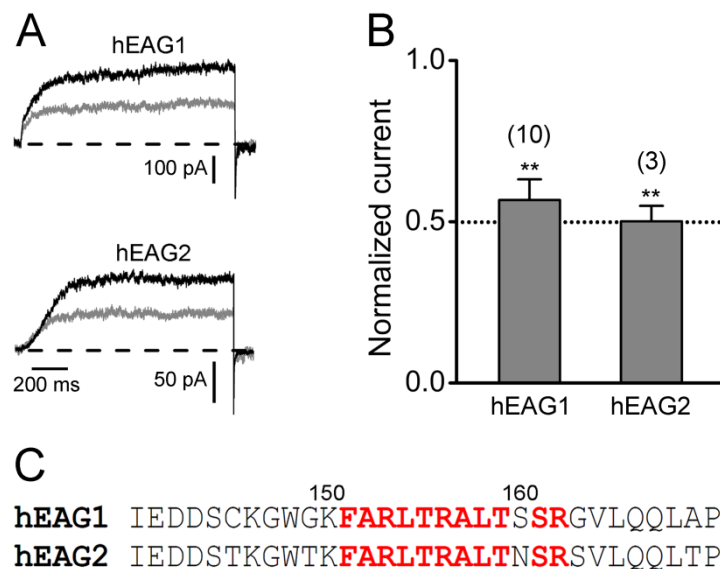

**Figure S1: Both hEAG2 and hEAG1 channels are inhibited by PIP<sub>2</sub>.** (A) Representative current traces of hEAG1 and hEAG2 channels before and 30 s

following application of 3  $\mu$ M PIP2. The currents were elicited by pulses to 40 mV from a holding potential of  $-80$  mV. **(B)** Normalized hEAG1 channel peak current before and after PIP2 (3  $\mu$ M) application.  $P < 0.01$  compared to the control level before PIP2 applications (Statistical significances were evaluated by one-way ANOVA with Student-Newman-Keuls's multiple comparisons test). **(C)** Sequence alignment of the N termini of hEAG1 and hEAG2 channels using ClustalW (<http://www.ebi.ac.uk/Tools/msa/clustalw2/>). The residues shown in red indicate the conserved residues that are key determinants of PIP2 inhibition on hEAG1 channels as shown in Figure 6.
